# Supplementary material for: Bacterial-Specific Aggregation and Killing of Immunomodulatory Host Defense Peptides
Source: MDPI journal article supplement (doi:10.3390/ph14090839), 2021-08-24
Supplement: s1 [file s1]

## **Supporting Information**

### **Bacterial Specific Aggregation and Killing of Immunomodulatory Host Defense Peptides**

*Nauman Nazeer<sup>1</sup>, Juan Carlos Rodriguez-Lecompte<sup>2</sup>, Marya Ahmed<sup>1,3</sup>*

Department of Chemistry<sup>1</sup>, Department of Pathology and Microbiology, Atlantic Veterinary College<sup>2</sup>, Faculty of Sustainable Design Engineering<sup>3</sup>; University of Prince Edward Island, Charlottetown, Prince Edward Island, Canada, C1A 4P3

Corresponding email address: [marahmed@upei.ca](mailto:marahmed@upei.ca); [jrodriguez@upei.ca](mailto:jrodriguez@upei.ca)

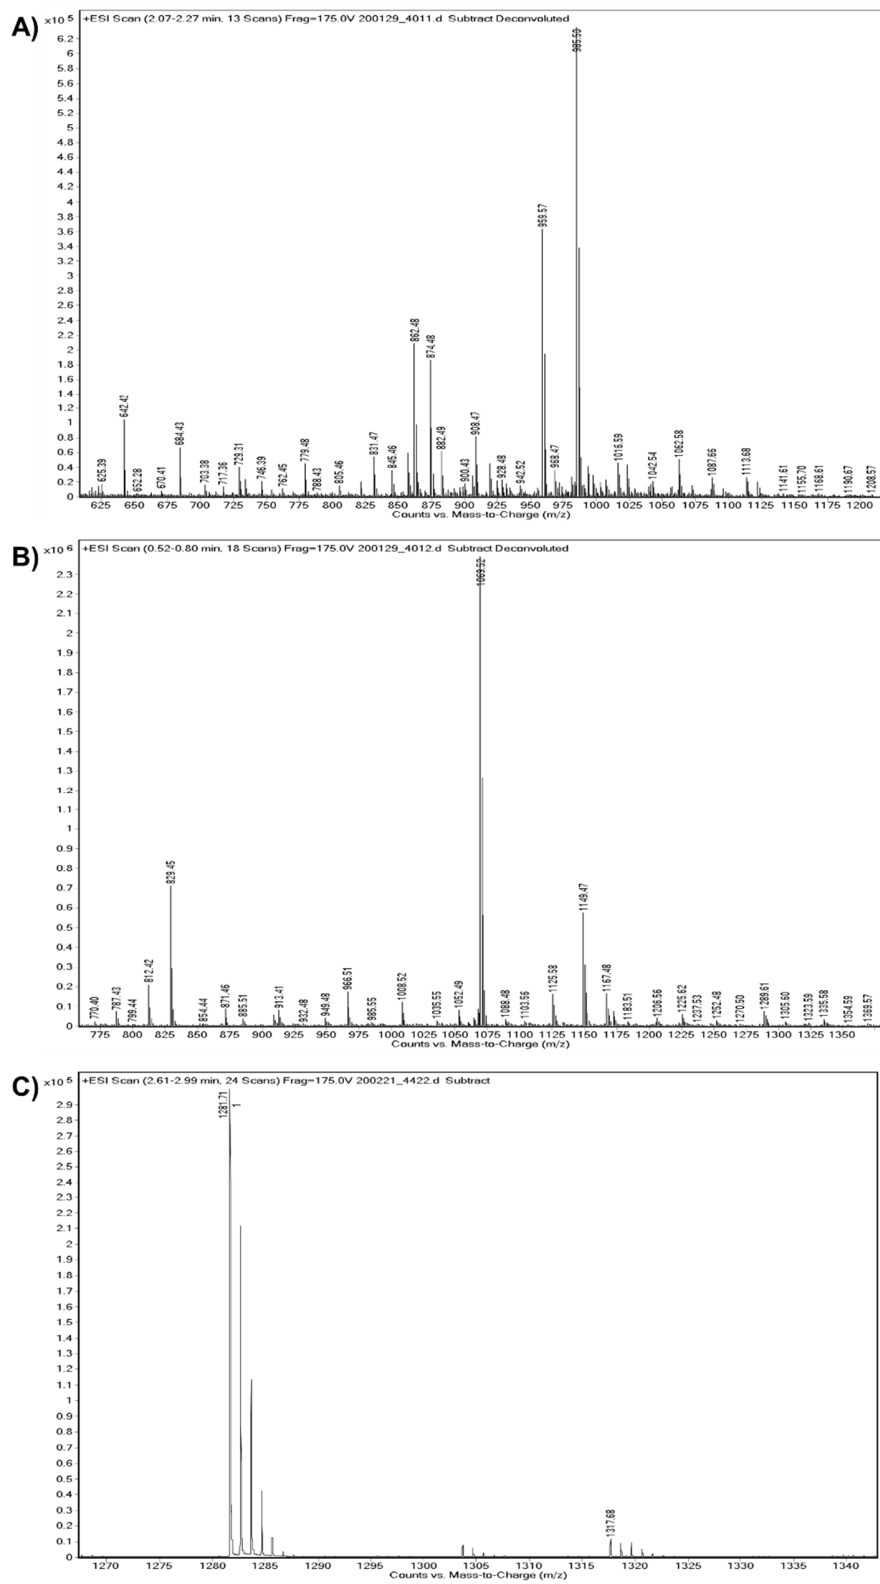

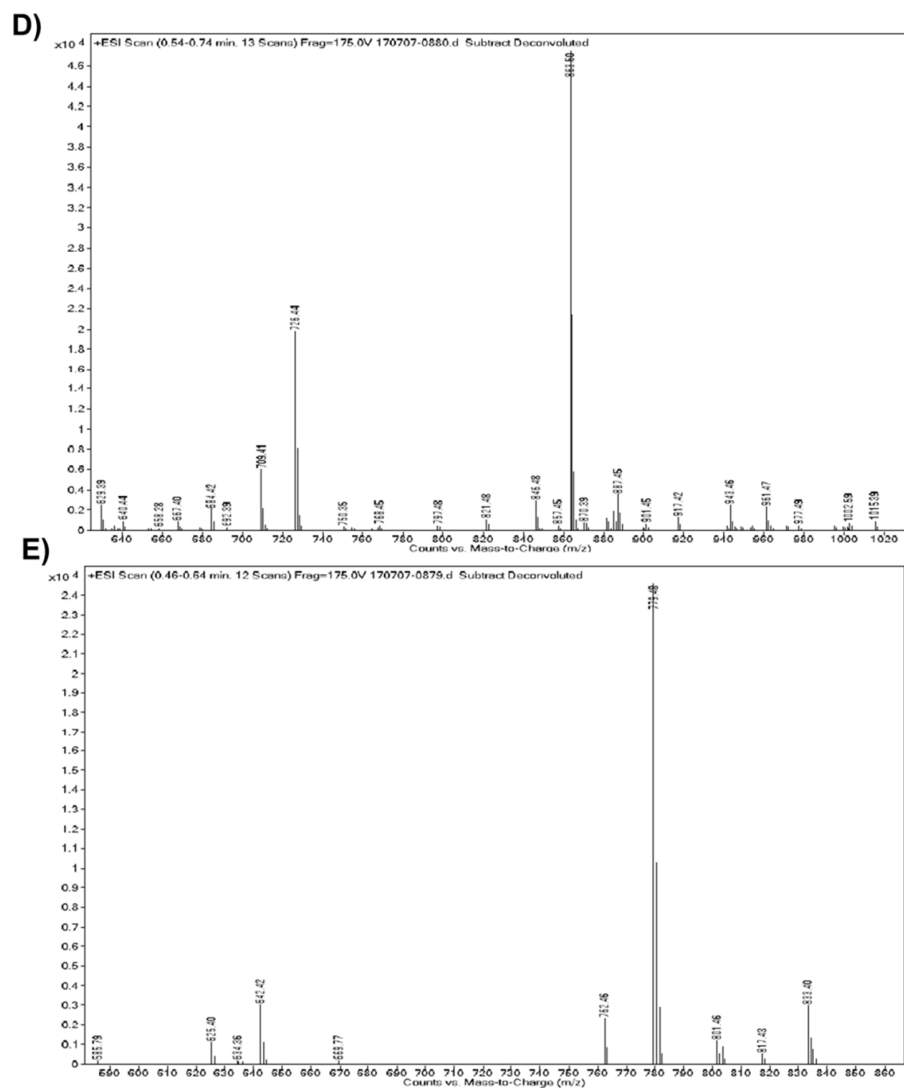

**Figure S1:** Mass spectrometry results for (A) mCA4-3; (B) mCA4-4; (C) mCA4-5; (D) mCA4-2; and (E) mCA4-1 peptides.

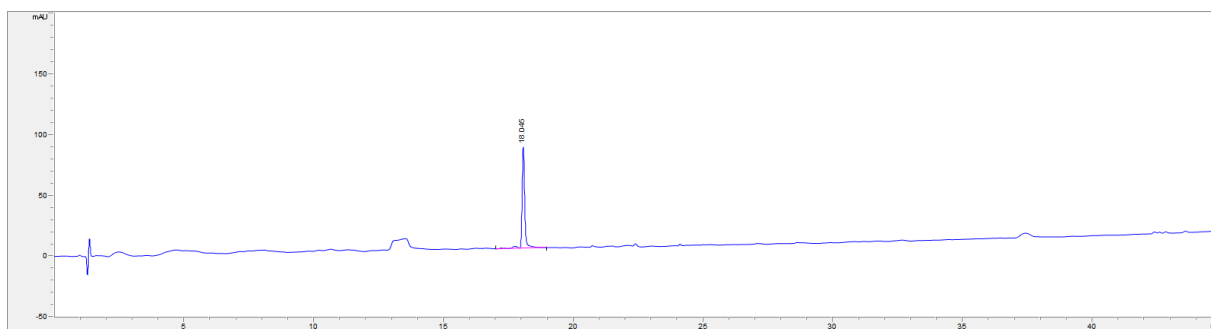

**Figure S2:** RP-HPLC chromatogram for mCA4-5 peptide.

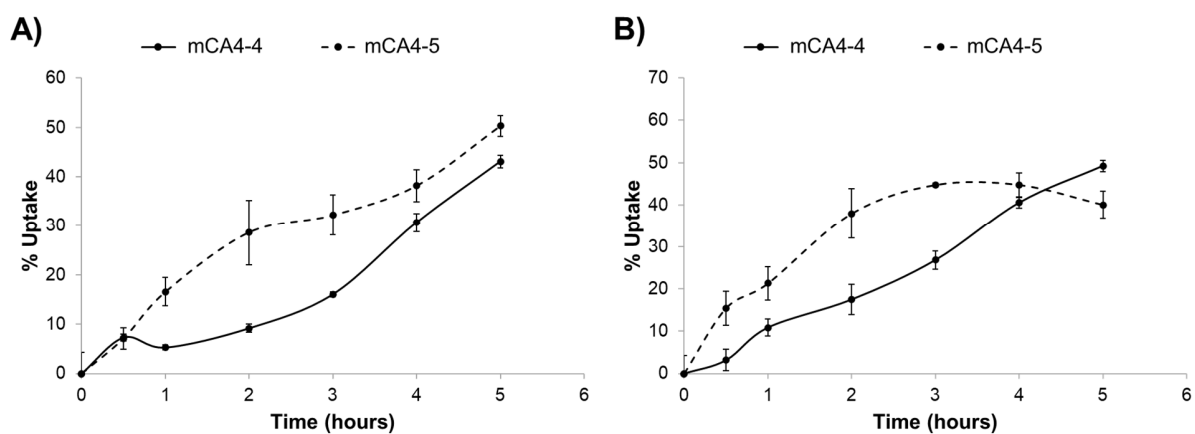

**Figure S3:** Uptake of selected AMPs in (A) *E. coli*; and (B) *B. subtilis*.

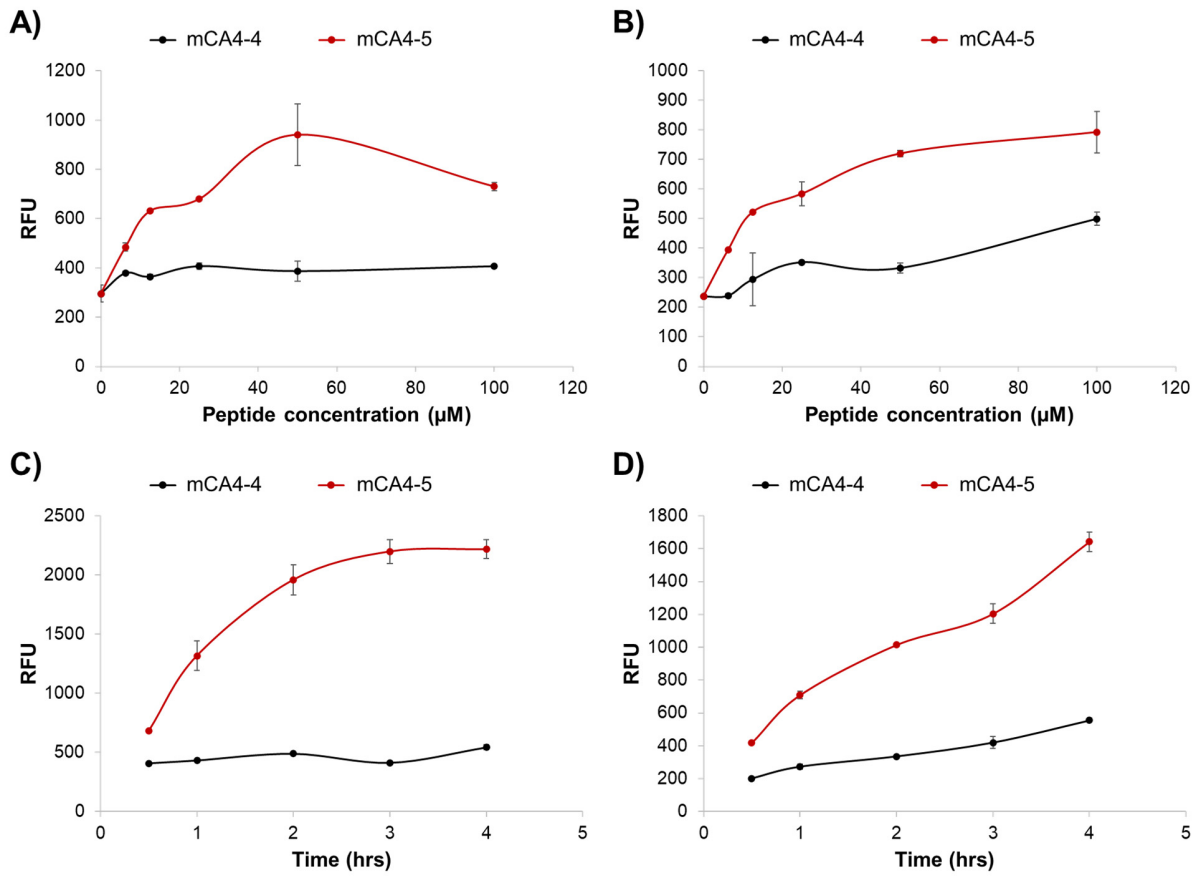

**Figure S4:** Membrane permeabilization efficacies AMPs in (A & C) *E. coli*; and (B & D) *B. subtilis*. A and B were done after a fixed time interval of 30 minutes. C and D were done using a fixed peptide concentration of 25μM.

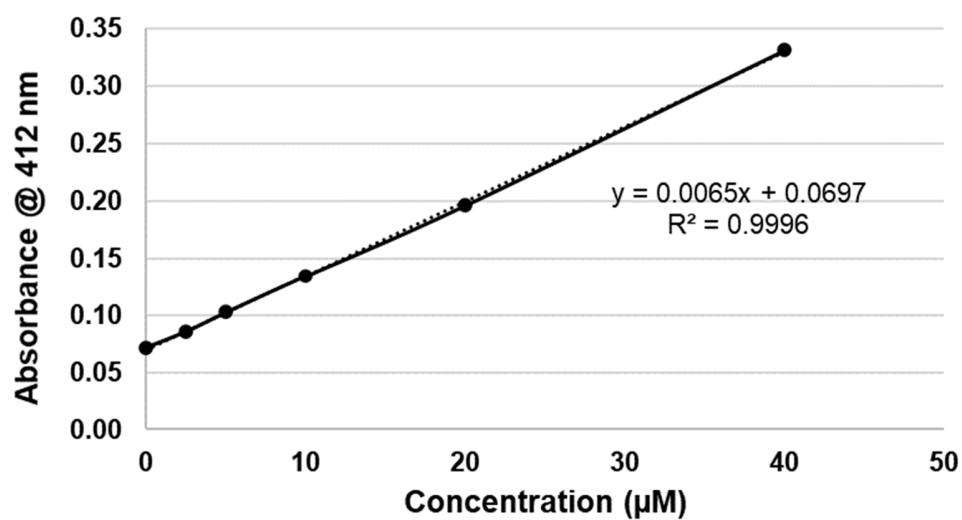

| Sample         | Mean Absorbance @ 420 nm |
|----------------|--------------------------|
| Blank          | 0.0718 ± 0.0004          |
| mCA4-4 (40 μM) | 0.087 ± 0.0002           |
| mCA4-5 (40 μM) | 0.0780 ± 0.001           |

**Figure S5:** Calibration of L-cysteine hydrochloride monohydrate by Elman's assay.

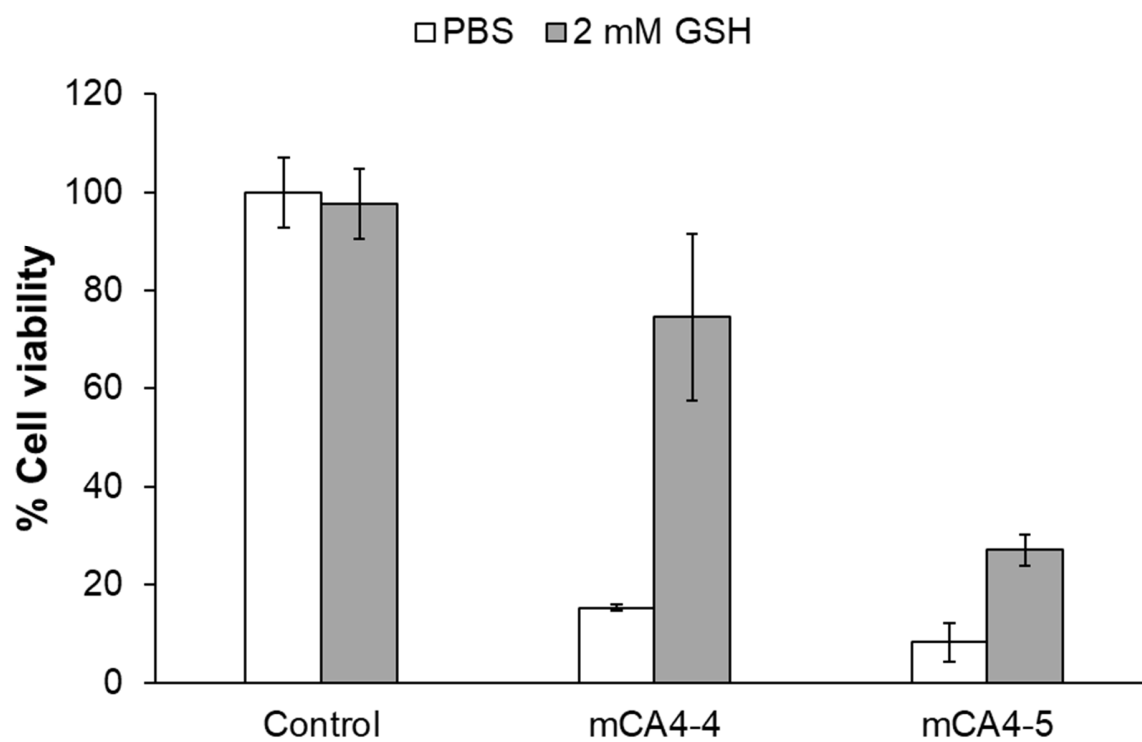

**Figure S6:** Effect of glutathione treatment on antimicrobial activity of peptides in *E. coli*. Peptide concentrations for mCA4-4 and mCA4-5 were 50 and 10  $\mu$ M, respectively.

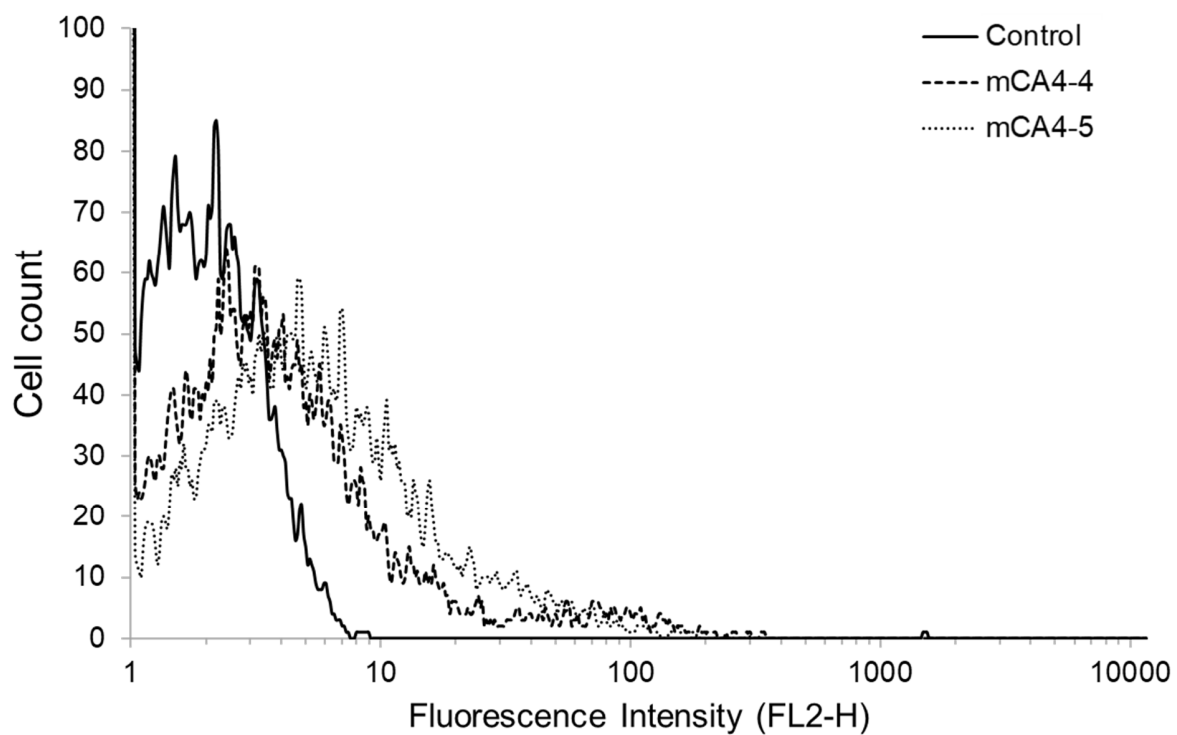

| Sample       | % Fluorescent cells |
|--------------|---------------------|
| Control      | —                   |
| mCA4-4-TAMRA | 19.8%               |
| mCA4-5-TAMRA | 32.9%               |

**Figure S7:** Flow cytometry data indicating cellular uptake of peptides in Caco-2 cells.



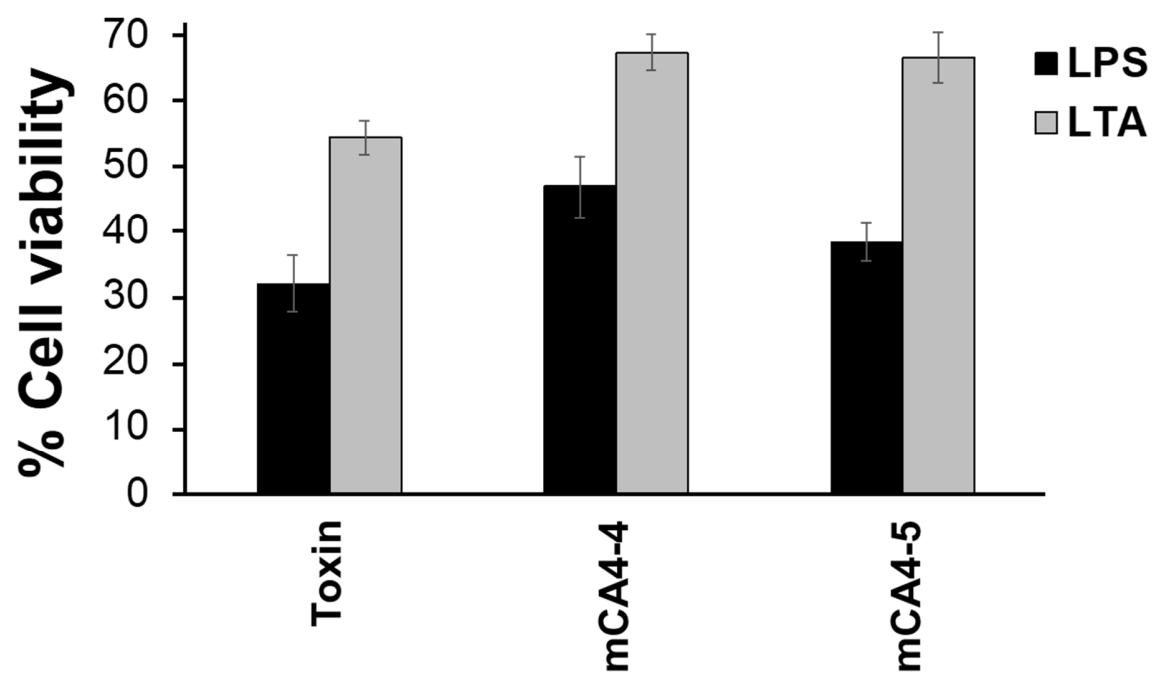

**Figure S8:** Toxin neutralization capability of peptides.

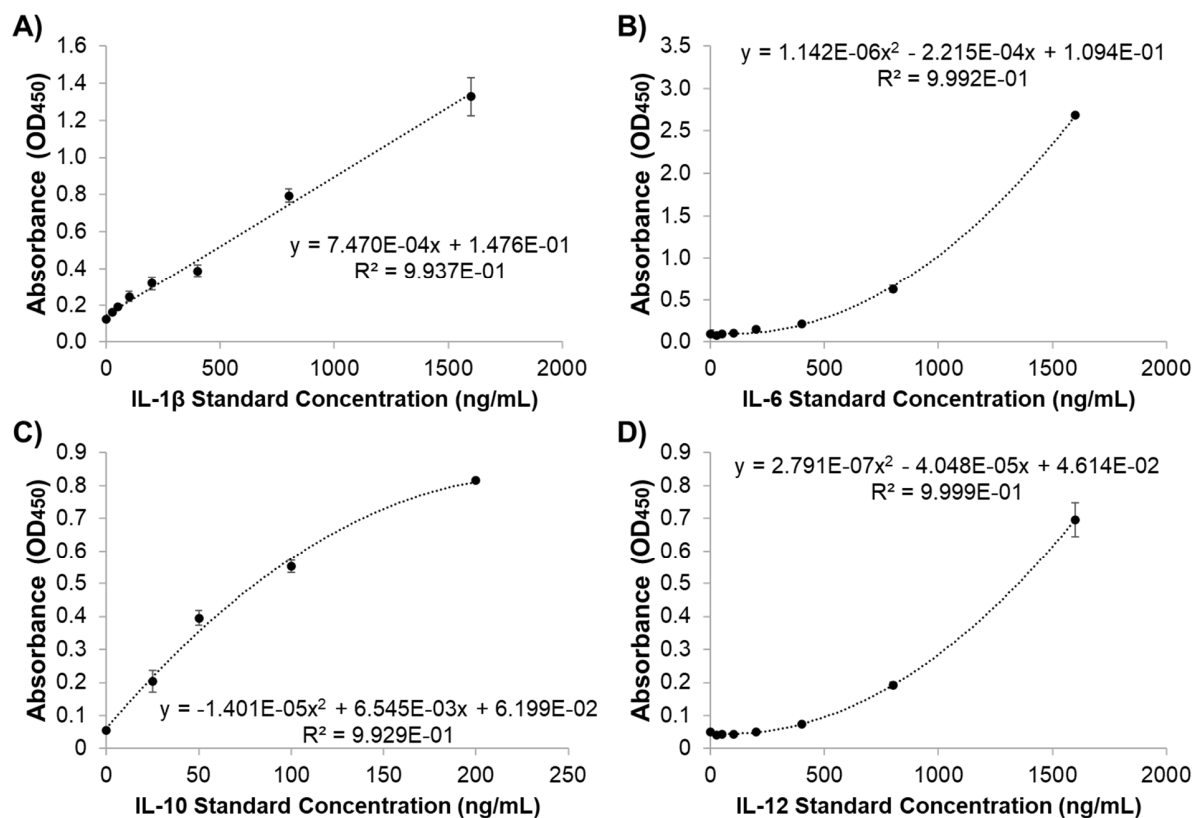

**Figure S9:** ELISA standard curves of (A) IL-1 $\beta$ ; (B) IL-6; (C) IL-10; and (D) IL-12.
